# Supplementary material
Source: PubMed Central journal article supplement (PMC5503209)

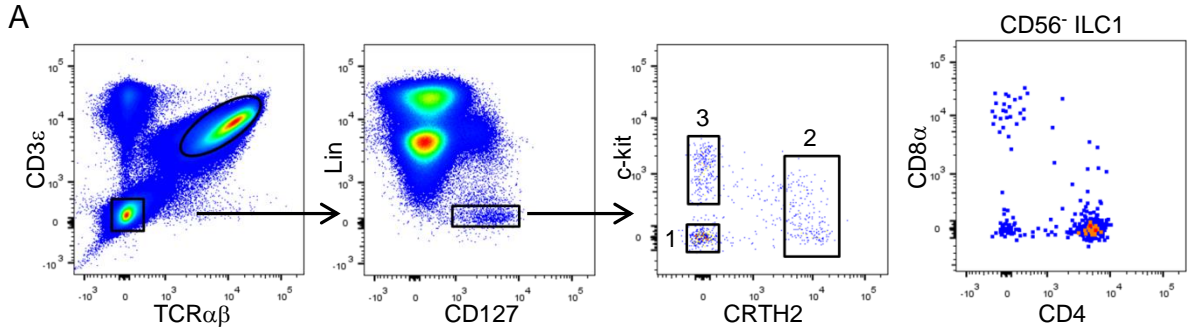

**B**

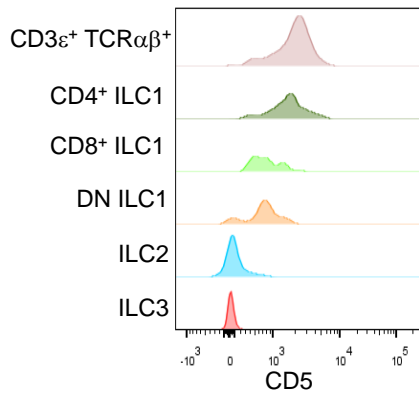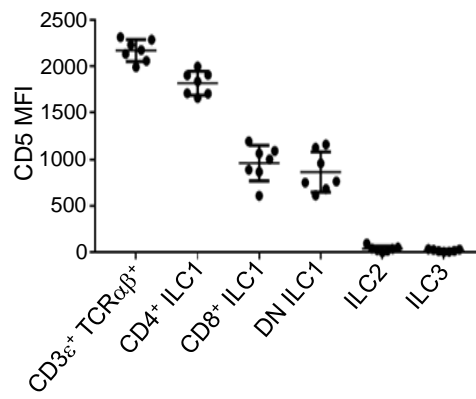

Supplement: NIHMS875029-supplement-1.pdf [file NIHMS875029-supplement-1.pdf]
